# Supplementary material for: Arsenic in Petroleum-Contaminated Groundwater near Bemidji, Minnesota Is Predicted to Persist for Centuries
Source: MDPI journal article supplement (doi:10.3390/w13111485), 2021-05-26
Supplement: s1 [file s1]

Article

# Arsenic in Petroleum-Contaminated Groundwater Near Bemidji, Minnesota Is Predicted to Persist for Centuries

Brady A. Ziegler <sup>1,5</sup>, G.-H. Crystal Ng <sup>2,3</sup>, Isabelle M. Cozzarelli <sup>4</sup>, Aubrey J. Dunshee <sup>2</sup> and Madeline E. Schreiber <sup>5,\*</sup>

<sup>1</sup> Department of Geosciences, Trinity University; bziegler@trinity.edu

<sup>2</sup> Department of Earth & Environmental Sciences, University of Minnesota; gcng@umn.edu (G.-H.C.N.); duns0034@umn.edu (A.J.D.)

<sup>3</sup> Saint Anthony Falls Laboratory, University of Minnesota

<sup>4</sup> U.S. Geological Survey; icozzare@usgs.gov

<sup>5</sup> Department of Geosciences, Virginia Tech

\* Correspondence: mschreib@vt.edu; Tel.: +011-540-231-6521

## Supplementary Materials

**Table S1.** Physical and chemical properties of bulk oil. Modified from Table 3 in [28].

| Parameter                                            | Value                 |
|------------------------------------------------------|-----------------------|
| Bulk oil                                             |                       |
| Density (g/cm <sup>3</sup> )                         | 0.854                 |
| Initial total mass (g/m of aquifer thickness)        | 7.77 ×10 <sup>6</sup> |
| BEX (mass fraction of initial oil)                   | 0.010                 |
| Toluene (mass fraction of initial oil)               | 0.0035                |
| NVDOC (mass fraction of initial oil)                 | 0.40                  |
| Short-chain n-alkanes (mass fraction of initial oil) | 0.074                 |
| Long-chain n-alkanes (mass fraction of initial oil)  | 0.1                   |

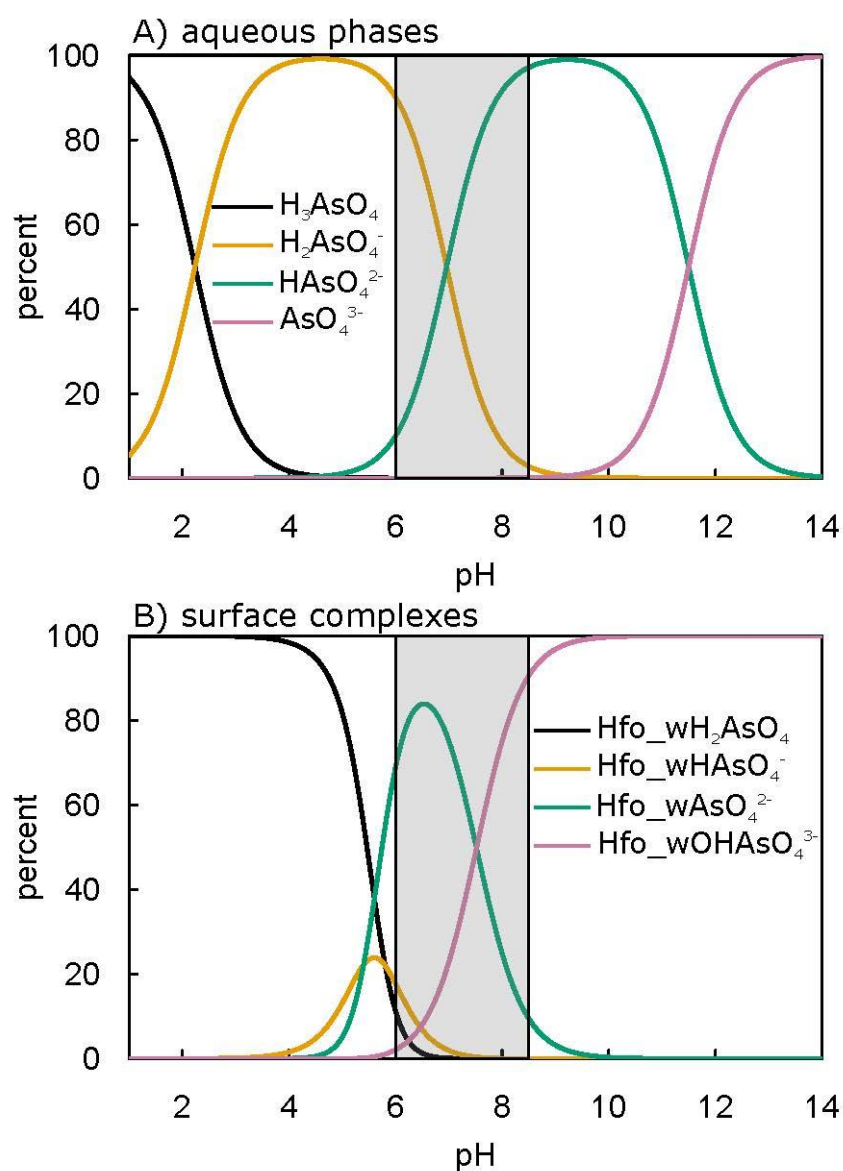

**Figure S1.** Generalized relative abundances of aqueous As(V) species (top) and As(V) surface complexes on  $\text{Fe}(\text{OH})_3$  (bottom). Aqueous species are determined from acid dissociation constants in Table 1. Surface species are determined from intrinsic complexation constants in Table 1. Modeled As(V) species are triprotic (black;  $\text{H}_3\text{AsO}_4/\text{Hfo\_wH}_2\text{AsO}_4$ ), diprotic (gold;  $\text{H}_2\text{AsO}_4^-/\text{Hfo\_wHAsO}_4^-$ ), monoprotic (green;  $\text{HAsO}_4^{2-}/\text{Hfo\_wAsO}_4^{2-}$ ), and unprotonated (pink;  $\text{AsO}_4^{3-}/\text{Hfo\_wOHAsO}_4^{3-}$ ). The monoprotic surface species (green) is omitted from [59]. The gray box indicates the pH range of most groundwaters (6–8.5).
